# Supplementary material for: Cascade reaction of isatins with nitro-substituted enamines: highly selective synthesis of functionalized (Z)-3-(1-(arylamino)-2-oxoarylidene)indolin-2-ones
Source: Royal Society of Chemistry journal article supplement (doi:10.1039/d0cc00923g), 2020-01-01

## TOC Graphic

# Cascade Reaction of Isatins with Nitro-substituted Enamines: Highly Selectively Synthesis of Functionalized (Z)-3-(1-(Arylamino)-2-oxoarylidene)indolin-2-ones

Cong-Hai Zhang, Rong Huang, Xia Qing, Jun Lin,\* and Sheng-Jiao Yan\*

A novel protocol for the construction of functionalized AOIDO from isatins **1** with nitro-substituted enamines **2** via an unprecedented cascade reaction catalyzed by sulfamic acid is developed.

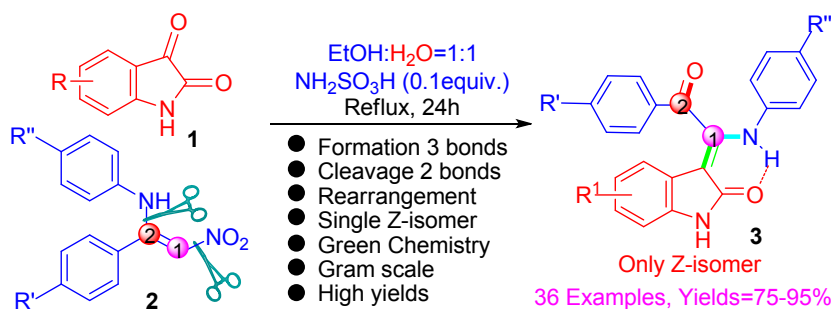

Supplement: d0cc00923g2.pdf [file d0cc00923g2.pdf]
